# Supplementary material
Source: MDPI journal article supplement (https://www.mdpi.com/1424-2818/15/4/558)
Supplement: s1 [file s1]

**Table S4.** Reaction system of PCR (25ul).

| Reaction system composition | Dosage (uL) |
|-----------------------------|-------------|
| 2×Rapid Taq Master Mix      | 12.5        |
| DNA Template                | 1.0         |
| forward primer (10μM/L)     | 1.0         |
| reverse primer (10μM/L)     | 1.0         |
| ddH <sub>2</sub> O          | 9.5         |
| Total                       | 25.0        |
