# Supplementary material
Source: MDPI journal article supplement (https://www.mdpi.com/1424-2818/15/4/558)
Supplement: s1 [file s1]

**Table S1.** List of taxa used for the phylogenetic analyses in this study.

| Subfamily      | Tribe          | Species                           | Genbank accession number |                 |              |             |                       |
|----------------|----------------|-----------------------------------|--------------------------|-----------------|--------------|-------------|-----------------------|
|                |                |                                   | <i>EF-1a</i>             | <i>Wingless</i> | <i>GAPDH</i> | <i>RpS5</i> | mitochondrial genomes |
| ingroups       |                |                                   |                          |                 |              |             |                       |
| Nymphalinae    | Kallimini      | <i>Doleschallia bisaltide</i>     | OQ161157*                | OQ161172*       | OQ161162*    | OQ161167*   | OP748221*             |
| Nymphalinae    | Kallimini      | <i>Kallima inachus</i>            | OQ161158*                | OQ161173*       | OQ161163*    | OQ161168*   | NC_016196.1           |
| Nymphalinae    | Kallimini      | <i>Catacroptera cloanthe</i>      | AY788724                 | AY788485        | GQ864939     | GQ865409    | NC_060330.1           |
| Nymphalinae    | Kallimini      | <i>Mallika jacksoni</i>           | -                        | AY788532.1      | AY788772.1   | GQ865465.1  | NC_050692.1           |
| Nymphalinae    | Junoniini      | <i>Yoma sabina</i>                | KX824720                 | EU053398        | -            | -           | NC_024403.1           |
| Nymphalinae    | Junoniini      | <i>Hypolimnias bolina</i>         | MG887690                 | MG887470        | MG887087     | MG887380    | NC_026072.1           |
| Nymphalinae    | Junoniini      | <i>Junonia lemonias</i>           | OQ161159*                | OQ161174*       | OQ161164*    | OQ161169*   | NC_028324.1           |
| Nymphalinae    | Junoniini      | <i>Junonia iphita</i>             | OQ161160*                | OQ161175*       | OQ161165*    | OQ161170*   | NC_033861.1           |
| Nymphalinae    | Junoniini      | <i>Precis andremiaja</i>          | AY788802.1               | AY788562.1      | -            | -           | NC_041242.1           |
| Nymphalinae    | Junoniini      | <i>Precis octavia</i>             | AY788807.1               | AY788567.1      | -            | -           | NC_064721.1           |
| Nymphalinae    | Junoniini      | <i>Protogoniomorpha parhassus</i> | AY788811.1               | AY788571.1      | -            | -           | NC_064726.1           |
| Nymphalinae    | Junoniini      | <i>Salamis anteva</i>             | AY788813.1               | AY788573.1      | -            | -           | NC_041243.1           |
| Nymphalinae    | Nymphalini     | <i>Aglais urticae</i>             | KY128402                 | KY128441        | FJ639522     | FJ639577    | LR990014.2            |
| Nymphalinae    | Nymphalini     | <i>Vanessa indica</i>             | GU372606                 | KX824731        | HQ734969     | HQ735045    | NC_038157.1           |
| Nymphalinae    | Nymphalini     | <i>Kaniska canace</i>             | KY128404                 | KY128446        | KY128414     | KY128426    | NC_058606.1           |
| Nymphalinae    | Nymphalini     | <i>Polygonia c-aureum</i>         | KX824697                 | KX824729        | FJ639513     | FJ639568    | NC_052687.1           |
| Nymphalinae    | Nymphalini     | <i>Inachis io</i>                 | KY128398                 | KY128435        | FJ639521     | FJ639576    | LR989926.1            |
| Nymphalinae    | Nymphalini     | <i>Smyrna blomfildia</i>          | AY788816.1               | AY788576.1      | EU141522.1   | EU141426.1  | MZ151338.1            |
| Nymphalinae    | Melitaeini     | <i>Mellicta athalia</i>           | FJ462297                 | FJ462171        | MN752801     | MN752767    | HG992208              |
| Nymphalinae    | Melitaeini     | <i>Melitaea cinxia</i>            | FJ462310                 | AY788536        | EU141518     | EU141420    | NC_018029.1           |
| Nymphalinae    | Coeini         | <i>Baeotus beotus</i>             | AY788720.1               | AY788481.1      | -            | GQ865400.1  | NC_057684.1           |
| Nymphalinae    | Victorini      | <i>Anartia jatrophae</i>          | AY788710.1               | KM013098.1      | -            | KM013202.1  | MT712074              |
| Nymphalinae    | Incertae cedis | <i>Kallimoides rumia</i>          | AY788770.1               | AY788530.1      | GQ864987.1   | GQ865457.1  | NC_050691.1           |
| outgroups      |                |                                   |                          |                 |              |             |                       |
| Pseudergolinae | Pseudergolini  | <i>Stibochiona nicea</i>          | OQ161156*                | OQ161171*       | OQ161161*    | OQ161166*   | NC_060638.1           |
| Biblidinae     | Biblidini      | <i>Ariadne ariadne</i>            | MW317953                 | MW318751        | MW317768     | MW317503    | NC_026069.1           |
| Cyrestinae     | Cyrestini      | <i>Cyrestis thyodamas</i>         | AY218260                 | AY218278        | EU141482     | EU141378    | NC_026071.1           |

Note: "\*" indicates that the new sequences in this study; "-" indicates the sequences is not obtained.
