# Supplementary material
Source: MDPI journal article supplement (https://www.mdpi.com/1424-2818/15/4/558)
Supplement: s1 [file s1]

**Table S2.** Collection information of five species.

| Species                       | Location                                                                                     | Collection Date |
|-------------------------------|----------------------------------------------------------------------------------------------|-----------------|
| <i>Doleschallia bisaltide</i> | Menglun Town, Mengla County, Xishuangbanna Dai Autonomous Prefecture, Yunnan Province, China | 25 July 2019    |
| <i>Kallima inachus</i>        | Xidong, Rongshui Miao Autonomous County, Liuzhou City, Guangxi Province, China               | 11 July 2019    |
| <i>Junonia lemonias</i>       | Menglun Town, Mengla County, Xishuangbanna Dai Autonomous Prefecture, Yunnan Province, China | 24 July 2019    |
| <i>Junonia iphita</i>         | Debao County, Baise City, Guangxi Zhuang Autonomous Region                                   | 16 July 2019    |
| <i>Stibochiona nicea</i>      | Bamian Mountain, Guidong County, Zhuzhou City, Hunan Province                                | 29 June 2019    |
