# Supplementary material
Source: MDPI journal article supplement (https://www.mdpi.com/1424-2818/15/4/558)
Supplement: s1 [file s1]

**Table S6.** Mitogenomic organization of *Doleschallia bisaltide*.

| Gene         | position |      | Size (bp) | Intergenic nucleotides | codon |      | Strand |
|--------------|----------|------|-----------|------------------------|-------|------|--------|
|              | from     | to   |           |                        | start | stop |        |
| <i>trnM</i>  | 1        | 68   | 68        |                        |       |      | J      |
| <i>trnI</i>  | 71       | 135  | 65        | 2                      |       |      | J      |
| <i>trnQ</i>  | 133      | 201  | 69        | -3                     |       |      | N      |
| <i>nad2</i>  | 250      | 1263 | 1014      | 48                     | ATT   | TAA  | J      |
| <i>trnW</i>  | 1262     | 1330 | 69        | -2                     |       |      | J      |
| <i>trnC</i>  | 1323     | 1384 | 62        | -8                     |       |      | N      |
| <i>trnY</i>  | 1384     | 1448 | 65        | -1                     |       |      | N      |
| <i>cox1</i>  | 1451     | 2981 | 1531      | 2                      | CGA   | T    | J      |
| <i>trnL2</i> | 2982     | 3049 | 68        | 0                      |       |      | J      |
| <i>cox2</i>  | 3050     | 3725 | 676       | 0                      | ATG   | T    | J      |
| <i>trnK</i>  | 3726     | 3796 | 71        | 0                      |       |      | J      |
| <i>trnD</i>  | 3796     | 3864 | 69        | -1                     |       |      | J      |
| <i>atp8</i>  | 3865     | 4029 | 165       | 0                      | ATT   | TAA  | J      |
| <i>atp6</i>  | 4023     | 4700 | 678       | -7                     | ATG   | TAA  | J      |
| <i>cox3</i>  | 4700     | 5488 | 789       | -1                     | ATG   | TAA  | J      |
| <i>trnG</i>  | 5491     | 5556 | 66        | 2                      |       |      | J      |
| <i>nad3</i>  | 5557     | 5910 | 354       | 0                      | ATT   | TAA  | J      |
| <i>trnA</i>  | 5926     | 5989 | 64        | 15                     |       |      | J      |
| <i>trnR</i>  | 5990     | 6052 | 63        | 0                      |       |      | J      |
| <i>trnN</i>  | 6053     | 6118 | 66        | 0                      |       |      | J      |

| Gene         | position |       | Size (bp) | Intergenic nucleotides | codon |      | Strand |
|--------------|----------|-------|-----------|------------------------|-------|------|--------|
|              | from     | to    |           |                        | start | stop |        |
| <i>trnS1</i> | 6117     | 6177  | 61        | -2                     |       |      | J      |
| <i>trnE</i>  | 6182     | 6246  | 65        | 4                      |       |      | J      |
| <i>trnF</i>  | 6265     | 6329  | 65        | 18                     |       |      | N      |
| <i>nad5</i>  | 6327     | 8061  | 1735      | -3                     | ATT   | T    | N      |
| <i>trnH</i>  | 8062     | 8127  | 66        | 0                      |       |      | N      |
| <i>nad4</i>  | 8128     | 9466  | 1339      | 0                      | ATG   | T    | N      |
| <i>nad4L</i> | 9467     | 9754  | 288       | 0                      | ATG   | TAA  | N      |
| <i>trnT</i>  | 9765     | 9828  | 64        | 10                     |       |      | J      |
| <i>trnP</i>  | 9829     | 9893  | 65        | 0                      |       |      | N      |
| <i>nad6</i>  | 9896     | 10423 | 528       | 2                      | ATT   | TAA  | J      |
| <i>cytb</i>  | 10430    | 11578 | 1149      | 6                      | ATG   | TAA  | J      |
| <i>trnS2</i> | 11590    | 11656 | 67        | 11                     |       |      | J      |
| <i>nad1</i>  | 11655    | 12611 | 957       | -2                     | ATG   | TAA  | N      |
| <i>trnL1</i> | 12613    | 12681 | 69        | 1                      |       |      | N      |
| <i>rrnL</i>  | 12682    | 14007 | 1326      | 0                      |       |      | N      |
| <i>trnV</i>  | 14008    | 14072 | 65        | 0                      |       |      | N      |
| <i>rrnS</i>  | 14073    | 14847 | 775       | 0                      |       |      | N      |
| CR           | 14848    | 16389 | 1542      | 0                      |       |      |        |
