# Supplementary material
Source: MDPI journal article supplement (https://www.mdpi.com/1424-2818/15/4/558)
Supplement: s1 [file s1]

**Table S3.** Primer sequences used in this study.

| Gene            | Primer name        | Sequence (5' to 3')        | Reference                  |
|-----------------|--------------------|----------------------------|----------------------------|
| EF-1 $\alpha$   | 1-EF-1 $\alpha$ -F | CACATYAACATTGTCGTSATYGG    | (Cho <i>et al.</i> , 1995) |
|                 | 1-EF-1 $\alpha$ -R | CATRTTGTCKCCGTGCCAKCC      | (Cho <i>et al.</i> , 1995) |
| <i>wingless</i> | <i>wingless</i> -F | GARTGYAARTGYCAYGGYATGTCTGG | (Brower & DeSalle, 1998)   |
|                 | <i>wingless</i> -R | ACTICGCARCACCARTGGAATGTRCA | (Brower & DeSalle, 1998)   |
| GAPDH           | GAPDH-F            | AARGCTGGRGCTGAATATGT       | (Wahlberg & Wheat, 2008)   |
|                 | GAPDH-R            | GWTTGAATGTACTTGATRAGRTC    | (Wahlberg & Wheat, 2008)   |
| RpS5            | RpS5-F             | ATGGCNGARGARAAYTGGAAYGA    | (Wahlberg & Wheat, 2008)   |
|                 | RpS5-R             | CGGTTRGAYTTRGCAACACG       | (Wahlberg & Wheat, 2008)   |
