# Supplementary material
Source: MDPI journal article supplement (https://www.mdpi.com/1424-2818/15/4/558)
Supplement: s1 [file s1]

**Table S5.** Best partitioning scheme and nucleotide substitution models for different datasets selected by PartitionFinder.

| Dataset   | Partition | Subset Partitions                                                                                                                                      | Model   |
|-----------|-----------|--------------------------------------------------------------------------------------------------------------------------------------------------------|---------|
| nDNA_BI   | P1        | GAPDH_pos1, EF-1 $\alpha$ _pos1, RpS5_pos1                                                                                                             | GTR+I+G |
|           | P2        | RpS5_pos2, GAPDH_pos2, EF-1 $\alpha$ _pos2                                                                                                             | F81+I   |
|           | P3        | wgl_pos3, RpS5_pos3, GAPDH_pos3                                                                                                                        | GTR+G   |
|           | P4        | EF-1 $\alpha$ _pos3                                                                                                                                    | GTR+G   |
|           | P5        | wgl_pos2, wgl_pos1                                                                                                                                     | K80+G   |
| nDNA_ML   | P1        | GAPDH_pos1, EF-1 $\alpha$ _pos1, RpS5_pos1                                                                                                             | TRN+I+G |
|           | P2        | RpS5_pos2, EF-1 $\alpha$ _pos2, GAPDH_pos2                                                                                                             | F81+I   |
|           | P3        | wgl_pos3, GAPDH_pos3, RpS5_pos3                                                                                                                        | GTR+G   |
|           | P4        | EF-1 $\alpha$ _pos3                                                                                                                                    | TVM+G   |
|           | P5        | wgl_pos1                                                                                                                                               | F81+I   |
|           | P6        | wgl_pos2                                                                                                                                               | K80     |
| PCG123_BI | P1        | <i>cox3</i> _pos1, <i>cytb</i> _pos1, <i>atp6</i> _pos1                                                                                                | GTR+I+G |
|           | P2        | <i>cox1</i> _pos2, <i>cox3</i> _pos2, <i>cox2</i> _pos2, <i>cytb</i> _pos2, <i>atp6</i> _pos2                                                          | GTR+I+G |
|           | P3        | <i>cox1</i> _pos3, <i>cox2</i> _pos3, <i>nad3</i> _pos3, <i>atp6</i> _pos3, <i>cox3</i> _pos3, <i>cytb</i> _pos3, <i>atp8</i> _pos3, <i>nad6</i> _pos3 | GTR+I+G |
|           | P4        | <i>atp8</i> _pos1, <i>atp8</i> _pos2                                                                                                                   | F81+I+G |
|           | P5        | <i>cox2</i> _pos1, <i>cox1</i> _pos1                                                                                                                   | GTR+I+G |
|           | P6        | <i>nad4L</i> _pos1, <i>nad1</i> _pos1, <i>nad4</i> _pos1, <i>nad5</i> _pos1                                                                            | GTR+I+G |
|           | P7        | <i>nad1</i> _pos2, <i>nad5</i> _pos2, <i>nad4</i> _pos2                                                                                                | GTR+I+G |
|           | P8        | <i>nad4</i> _pos3, <i>nad1</i> _pos3, <i>nad4L</i> _pos3, <i>nad5</i> _pos3                                                                            | GTR+G   |
|           | P9        | <i>nad2</i> _pos1, <i>nad3</i> _pos1, <i>nad6</i> _pos1                                                                                                | GTR+I+G |
|           | P10       | <i>nad4L</i> _pos2, <i>nad6</i> _pos2, <i>nad3</i> _pos2, <i>nad2</i> _pos2                                                                            | HKY+I+G |
|           | P11       | <i>nad2</i> _pos3                                                                                                                                      | GTR+G   |
| PCG123_ML | P1        | <i>cox3</i> _pos1, <i>atp6</i> _pos1, <i>cytb</i> _pos1                                                                                                | GTR+I+G |

| Dataset    | Partition | Subset Partitions                                                                             | Model   |
|------------|-----------|-----------------------------------------------------------------------------------------------|---------|
| PCG123R_BI | P2        | <i>cox1_pos2, cytb_pos2, cox2_pos2, cox3_pos2, atp6_pos2</i>                                  | TVM+I+G |
|            | P3        | <i>cox1_pos3, nad3_pos3, cox3_pos3, cytb_pos3, atp8_pos3, nad6_pos3, cox2_pos3, atp6_pos3</i> | TIM+I+G |
|            | P4        | <i>atp8_pos1, atp8_pos2, nad2_pos1, nad3_pos1, nad6_pos1</i>                                  | GTR+I+G |
|            | P5        | <i>cox2_pos1, cox1_pos1</i>                                                                   | TRN+I+G |
|            | P6        | <i>nad4L_pos1, nad5_pos1, nad1_pos1, nad4_pos1</i>                                            | GTR+I+G |
|            | P7        | <i>nad1_pos2, nad5_pos2, nad4_pos2</i>                                                        | GTR+I+G |
|            | P8        | <i>nad4_pos3, nad1_pos3, nad4L_pos3, nad5_pos3</i>                                            | TIM+G   |
|            | P9        | <i>nad4L_pos2, nad6_pos2, nad3_pos2, nad2_pos2</i>                                            | HKY+I+G |
|            | P10       | <i>nad2_pos3</i>                                                                              | TIM+G   |
|            | P1        | <i>cox3_pos1, cytb_pos1, atp6_pos1</i>                                                        | GTR+I+G |
|            | P2        | <i>cox1_pos2, cox3_pos2, cox2_pos2, cytb_pos2, atp6_pos2</i>                                  | GTR+I+G |
|            | P3        | <i>nad3_pos3, atp6_pos3, cox3_pos3, cytb_pos3, cox1_pos3, cox2_pos3, atp8_pos3, nad6_pos3</i> | GTR+I+G |
|            | P4        | <i>atp8_pos1, atp8_pos2</i>                                                                   | F81+I+G |
|            | P5        | <i>cox2_pos1, cox1_pos1</i>                                                                   | GTR+I+G |
|            | P6        | <i>nad4L_pos1, nad1_pos1, nad4_pos1, nad5_pos1</i>                                            | GTR+I+G |
|            | P7        | <i>nad1_pos2, nad5_pos2, nad4_pos2</i>                                                        | GTR+I+G |
|            | P8        | <i>nad4_pos3, nad1_pos3, nad4L_pos3, nad5_pos3</i>                                            | GTR+G   |
|            | P9        | <i>nad2_pos1, nad3_pos1, nad6_pos1</i>                                                        | GTR+I+G |
|            | P10       | <i>nad4L_pos2, nad6_pos2, nad3_pos2, nad2_pos2</i>                                            | HKY+I+G |
|            | P11       | <i>nad2_pos3</i>                                                                              | GTR+G   |
| PCG123R_ML | P12       | <i>rrnL, rrnS</i>                                                                             | GTR+I+G |
|            | P1        | <i>cox3_pos1, atp6_pos1, cytb_pos1</i>                                                        | GTR+I+G |
|            | P2        | <i>cox1_pos2, cytb_pos2, cox2_pos2, cox3_pos2, atp6_pos2</i>                                  | TVM+I+G |
|            | P3        | <i>cox1_pos3, nad3_pos3, cox2_pos3, atp6_pos3, cox3_pos3, cytb_pos3, atp8_pos3, nad6_pos3</i> | TIM+I+G |
|            | P4        | <i>atp8_pos1, atp8_pos2, nad2_pos1, nad3_pos1, nad6_pos1</i>                                  | GTR+I+G |

| Dataset     | Partition | Subset Partitions                                                                                   | Model   |
|-------------|-----------|-----------------------------------------------------------------------------------------------------|---------|
| PCG123RT_BI | P5        | <i>cox2_pos1, cox1_pos1</i>                                                                         | TRN+I+G |
|             | P6        | <i>nad4L_pos1, nad5_pos1, nad1_pos1, nad4_pos1</i>                                                  | GTR+I+G |
|             | P7        | <i>nad1_pos2, nad5_pos2, nad4_pos2</i>                                                              | GTR+I+G |
|             | P8        | <i>nad4_pos3, nad1_pos3, nad4L_pos3, nad5_pos3</i>                                                  | TIM+G   |
|             | P9        | <i>nad4L_pos2, nad6_pos2, nad3_pos2, nad2_pos2</i>                                                  | HKY+I+G |
|             | P10       | <i>nad2_pos3</i>                                                                                    | TIM+G   |
|             | P11       | <i>rrnL, rrnS</i>                                                                                   | GTR+I+G |
|             | P1        | <i>cox3_pos1, cytb_pos1, atp6_pos1, nad3_pos1, trnK, trnT</i>                                       | GTR+I+G |
|             | P2        | <i>trnM, cytb_pos2, atp6_pos2, trnL2, cox3_pos2, cox2_pos2</i>                                      | GTR+I+G |
|             | P3        | <i>nad6_pos3, cox1_pos3, cox2_pos3, atp8_pos3, nad3_pos3, atp6_pos3, cox3_pos3, cytb_pos3</i>       | GTR+I+G |
|             | P4        | <i>atp8_pos1, trnS1, atp8_pos2</i>                                                                  | F81+I+G |
|             | P5        | <i>cox2_pos1, cox1_pos1</i>                                                                         | GTR+I+G |
|             | P6        | <i>cox1_pos2</i>                                                                                    | HKY+I   |
|             | P7        | <i>trnH, trnQ, trnL1, trnV, trnP, trnI, trnC, nad4L_pos1, nad1_pos1, trnR, nad5_pos1, nad4_pos1</i> | GTR+I+G |
|             | P8        | <i>nad1_pos2, nad5_pos2, nad4_pos2</i>                                                              | GTR+I+G |
| PCG123RT_ML | P9        | <i>nad1_pos3, nad4_pos3, nad4L_pos3, nad5_pos3</i>                                                  | GTR+G   |
|             | P10       | <i>trnE, nad6_pos1, nad2_pos1</i>                                                                   | GTR+I+G |
|             | P11       | <i>nad4L_pos2, nad6_pos2, nad3_pos2, nad2_pos2</i>                                                  | HKY+I+G |
|             | P12       | <i>nad2_pos3</i>                                                                                    | GTR+G   |
|             | P13       | <i>trnA, trnY, rrnS, rrnL, trnG, trnS2, trnW, trnD, trnN, trnF</i>                                  | GTR+I+G |
|             | P1        | <i>cox3_pos1, atp6_pos1, cytb_pos1, trnK</i>                                                        | GTR+I+G |
|             | P2        | <i>trnM, trnL2, cytb_pos2, cox2_pos2, cox3_pos2, atp6_pos2</i>                                      | TVM+I+G |
|             | P3        | <i>cox1_pos3, cox2_pos3, nad3_pos3, atp6_pos3, cox3_pos3, cytb_pos3, atp8_pos3, nad6_pos3</i>       | TIM+I+G |
|             | P4        | <i>trnE, trnP, trnT, nad2_pos1, nad3_pos1, nad6_pos1, trnS1, atp8_pos1, atp8_pos2</i>               | GTR+I+G |
|             | P5        | <i>trnH, trnQ, cox2_pos1, cox1_pos1</i>                                                             | TRN+I+G |

| Dataset    | Partition | Subset Partitions                                                                                        | Model     |
|------------|-----------|----------------------------------------------------------------------------------------------------------|-----------|
| PCG123N_BI | P6        | <i>cox1_pos2</i>                                                                                         | HKY+I     |
|            | P7        | <i>trnV, trnF, nad5_pos1, trnL1, trnC, nad4L_pos1, trnI, nad1_pos1, nad4_pos1</i>                        | GTR+I+G   |
|            | P8        | <i>nad1_pos2, nad5_pos2, nad4_pos2</i>                                                                   | GTR+I+G   |
|            | P9        | <i>nad4_pos3, nad1_pos3, nad4L_pos3, nad5_pos3</i>                                                       | TIM+G     |
|            | P10       | <i>nad4L_pos2, nad6_pos2, nad3_pos2, nad2_pos2</i>                                                       | HKY+I+G   |
|            | P11       | <i>nad2_pos3</i>                                                                                         | TIM+G     |
|            | P12       | <i>rrnL, rrnS</i>                                                                                        | GTR+I+G   |
|            | P13       | <i>trnD, trnN, trnG, trnW, trnS2, trnY, trnR, trnA</i>                                                   | K81UF+I+G |
|            | P1        | <i>wgl_pos1, GAPDH_pos1, RpS5_pos1, EF-1<math>\alpha</math>_pos1</i>                                     | GTR+I+G   |
|            | P2        | <i>RpS5_pos2, EF-1<math>\alpha</math>_pos2, GAPDH_pos2, cox1_pos2</i>                                    | F81+I     |
|            | P3        | <i>wgl_pos3, GAPDH_pos3, RpS5_pos3</i>                                                                   | GTR+G     |
|            | P4        | <i>EF-1<math>\alpha</math>_pos3</i>                                                                      | GTR+G     |
|            | P5        | <i>wgl_pos2</i>                                                                                          | K80       |
|            | P6        | <i>cox3_pos1, cytb_pos1, atp6_pos1</i>                                                                   | GTR+I+G   |
|            | P7        | <i>cox3_pos2, cox2_pos2, atp6_pos2, cytb_pos2</i>                                                        | GTR+I+G   |
|            | P8        | <i>nad2_pos3, cox1_pos3, cox2_pos3, nad3_pos3, atp6_pos3, cox3_pos3, cytb_pos3, atp8_pos3, nad6_pos3</i> | GTR+I+G   |
|            | P9        | <i>atp8_pos1, atp8_pos2</i>                                                                              | F81+I+G   |
|            | P10       | <i>cox2_pos1, cox1_pos1</i>                                                                              | GTR+I+G   |
|            | P11       | <i>nad4L_pos1, nad1_pos1, nad4_pos1, nad5_pos1</i>                                                       | GTR+I+G   |
|            | P12       | <i>nad1_pos2, nad5_pos2, nad4_pos2</i>                                                                   | GTR+I+G   |
| PCG123N_ML | P13       | <i>nad4_pos3, nad1_pos3, nad4L_pos3, nad5_pos3</i>                                                       | GTR+G     |
|            | P14       | <i>nad2_pos1, nad3_pos1, nad6_pos1</i>                                                                   | GTR+I+G   |
|            | P15       | <i>nad4L_pos2, nad6_pos2, nad2_pos2, nad3_pos2</i>                                                       | HKY+I+G   |
|            | P1        | <i>RpS5_pos1, GAPDH_pos1, EF-1<math>\alpha</math>_pos1</i>                                               | TRN+I+G   |
|            | P2        | <i>RpS5_pos2, EF-1<math>\alpha</math>_pos2, GAPDH_pos2, cox1_pos2</i>                                    | F81+I     |

| Dataset     | Partition | Subset Partitions                                                                                 | Model   |
|-------------|-----------|---------------------------------------------------------------------------------------------------|---------|
| PCG123RN_BI | P3        | wgl_pos3, GAPDH_pos3, RpS5_pos3                                                                   | GTR+G   |
|             | P4        | EF-1 $\alpha$ _pos3                                                                               | TVM+G   |
|             | P5        | wgl_pos1                                                                                          | K81+I   |
|             | P6        | wgl_pos2                                                                                          | K80     |
|             | P7        | cox3_pos1, cytb_pos1, atp6_pos1                                                                   | GTR+I+G |
|             | P8        | cytb_pos2, cox2_pos2, atp6_pos2, cox3_pos2                                                        | TVM+I+G |
|             | P9        | cox1_pos3, nad3_pos3, atp6_pos3, cytb_pos3, cox3_pos3, atp8_pos3, cox2_pos3, nad6_pos3            | TIM+I+G |
|             | P10       | atp8_pos1, atp8_pos2, nad2_pos1, nad3_pos1, nad6_pos1                                             | GTR+I+G |
|             | P11       | cox2_pos1, cox1_pos1                                                                              | TRN+I+G |
|             | P12       | nad4L_pos1, nad5_pos1, nad1_pos1, nad4_pos1                                                       | GTR+I+G |
|             | P13       | nad1_pos2, nad4_pos2, nad5_pos2                                                                   | GTR+I+G |
|             | P14       | nad4_pos3, nad1_pos3, nad4L_pos3, nad5_pos3                                                       | TIM+G   |
|             | P15       | nad4L_pos2, nad6_pos2, nad3_pos2, nad2_pos2                                                       | HKY+I+G |
|             | P16       | nad2_pos3                                                                                         | TIM+G   |
|             | P1        | wgl_pos1, GAPDH_pos1, RpS5_pos1, EF-1 $\alpha$ _pos1                                              | GTR+I+G |
|             | P2        | RpS5_pos2, EF-1 $\alpha$ _pos2, GAPDH_pos2, cox1_pos2                                             | F81+I   |
|             | P3        | EF-1 $\alpha$ _pos3, wgl_pos3, GAPDH_pos3, RpS5_pos3                                              | GTR+G   |
|             | P4        | wgl_pos2                                                                                          | K80     |
|             | P5        | cox3_pos1, cytb_pos1, atp6_pos1                                                                   | GTR+I+G |
|             | P6        | cox3_pos2, cox2_pos2, atp6_pos2, cytb_pos2                                                        | GTR+I+G |
|             | P7        | nad2_pos3, nad3_pos3, atp6_pos3, cytb_pos3, cox3_pos3, cox1_pos3, cox2_pos3, atp8_pos3, nad6_pos3 | GTR+I+G |
|             | P8        | atp8_pos1, atp8_pos2                                                                              | F81+I+G |
|             | P9        | cox2_pos1, cox1_pos1                                                                              | GTR+I+G |
|             | P10       | nad4L_pos1, nad1_pos1, nad5_pos1, nad4_pos1                                                       | GTR+I+G |
|             | P11       | nad1_pos2, nad5_pos2, nad4_pos2                                                                   | GTR+I+G |

| Dataset      | Partition | Subset Partitions                                                                             | Model   |
|--------------|-----------|-----------------------------------------------------------------------------------------------|---------|
| PCG123RN_ML  | P12       | <i>nad4_pos3, nad1_pos3, nad4L_pos3, nad5_pos3</i>                                            | GTR+G   |
|              | P13       | <i>nad2_pos1, nad3_pos1, nad6_pos1</i>                                                        | GTR+I+G |
|              | P14       | <i>nad4L_pos2, nad6_pos2, nad2_pos2, nad3_pos2</i>                                            | HKY+I+G |
|              | P15       | <i>rrnL, rrnS</i>                                                                             | GTR+I+G |
|              | P1        | RpS5_pos1, GAPDH_pos1, EF-1 $\alpha$ _pos1                                                    | TRN+I+G |
|              | P2        | RpS5_pos2, EF-1 $\alpha$ _pos2, GAPDH_pos2, <i>cox1_pos2</i>                                  | F81+I   |
|              | P3        | wgl_pos3, GAPDH_pos3, RpS5_pos3                                                               | GTR+G   |
|              | P4        | EF-1 $\alpha$ _pos3                                                                           | TVM+G   |
|              | P5        | wgl_pos1                                                                                      | K81+I   |
|              | P6        | wgl_pos2                                                                                      | K80     |
|              | P7        | <i>cox3_pos1, cytb_pos1, atp6_pos1</i>                                                        | GTR+I+G |
|              | P8        | <i>cytb_pos2, cox2_pos2, atp6_pos2, cox3_pos2</i>                                             | TVM+I+G |
|              | P9        | <i>cox1_pos3, cox2_pos3, nad3_pos3, atp6_pos3, cytb_pos3, cox3_pos3, atp8_pos3, nad6_pos3</i> | TIM+I+G |
|              | P10       | <i>atp8_pos1, atp8_pos2, nad2_pos1, nad3_pos1, nad6_pos1</i>                                  | GTR+I+G |
|              | P11       | <i>cox2_pos1, cox1_pos1</i>                                                                   | TRN+I+G |
|              | P12       | <i>nad4L_pos1, nad5_pos1, nad1_pos1, nad4_pos1</i>                                            | GTR+I+G |
|              | P13       | <i>nad1_pos2, nad4_pos2, nad5_pos2</i>                                                        | GTR+I+G |
|              | P14       | <i>nad4_pos3, nad1_pos3, nad4L_pos3, nad5_pos3</i>                                            | TIM+G   |
|              | P15       | <i>nad4L_pos2, nad6_pos2, nad3_pos2, nad2_pos2</i>                                            | HKY+I+G |
|              | P16       | <i>nad2_pos3</i>                                                                              | TIM+G   |
| PCG123RTN_BI | P17       | <i>rrnL, rrnS</i>                                                                             | GTR+I+G |
|              | P1        | GAPDH_pos1, RpS5_pos1, EF-1 $\alpha$ _pos1                                                    | GTR+I+G |
|              | P2        | RpS5_pos2, EF-1 $\alpha$ _pos2, GAPDH_pos2, <i>cox1_pos2</i>                                  | F81+I   |
|              | P3        | EF-1 $\alpha$ _pos3, wgl_pos3, GAPDH_pos3, RpS5_pos3                                          | GTR+G   |
|              | P4        | wgl_pos2, <i>trnM</i> , wgl_pos1                                                              | K80+G   |

| Dataset      | Partition | Subset Partitions                                                                                        | Model   |
|--------------|-----------|----------------------------------------------------------------------------------------------------------|---------|
| PCG123RTN_ML | P5        | <i>cox3_pos1, cytb_pos1, atp6_pos1, nad3_pos1, trnK, trnT</i>                                            | GTR+I+G |
|              | P6        | <i>atp6_pos2, cytb_pos2, trnL2, cox3_pos2, cox2_pos2</i>                                                 | GTR+I+G |
|              | P7        | <i>nad2_pos3, nad3_pos3, atp6_pos3, cox3_pos3, cytb_pos3, atp8_pos3, nad6_pos3, cox1_pos3, cox2_pos3</i> | GTR+I+G |
|              | P8        | <i>atp8_pos1, atp8_pos2, trnS1</i>                                                                       | F81+I+G |
|              | P9        | <i>cox2_pos1, cox1_pos1</i>                                                                              | GTR+I+G |
|              | P10       | <i>trnH, trnQ, trnL1, trnV, trnP, trnI, trnC, nad4L_pos1, nad1_pos1, trnR, nad4_pos1, nad5_pos1</i>      | GTR+I+G |
|              | P11       | <i>nad1_pos2, nad5_pos2, nad4_pos2</i>                                                                   | GTR+I+G |
|              | P12       | <i>nad4_pos3, nad1_pos3, nad4L_pos3, nad5_pos3</i>                                                       | GTR+G   |
|              | P13       | <i>trnE, nad6_pos1, nad2_pos1</i>                                                                        | GTR+I+G |
|              | P14       | <i>nad4L_pos2, nad6_pos2, nad2_pos2, nad3_pos2</i>                                                       | HKY+I+G |
|              | P15       | <i>trnA, trnY, rrnL, rrnS, trnG, trnD, trnF, trnN, trnS2, trnW</i>                                       | GTR+I+G |
|              | P1        | <i>RpS5_pos1, GAPDH_pos1, EF-1<math>\alpha</math>_pos1</i>                                               | TRN+I+G |
|              | P2        | <i>RpS5_pos2, EF-1<math>\alpha</math>_pos2, GAPDH_pos2, cox1_pos2</i>                                    | F81+I   |
|              | P3        | <i>wgl_pos3, GAPDH_pos3, RpS5_pos3</i>                                                                   | GTR+G   |
|              | P4        | <i>EF-1<math>\alpha</math>_pos3</i>                                                                      | TVM+G   |
|              | P5        | <i>wgl_pos1</i>                                                                                          | K81+I   |
|              | P6        | <i>wgl_pos2</i>                                                                                          | K80     |
|              | P7        | <i>cox3_pos1, atp6_pos1, cytb_pos1, trnK</i>                                                             | GTR+I+G |
|              | P8        | <i>trnM, trnL2, cytb_pos2, cox2_pos2, atp6_pos2, cox3_pos2</i>                                           | TVM+I+G |
|              | P9        | <i>cox2_pos3, cox1_pos3, nad3_pos3, atp6_pos3, cytb_pos3, cox3_pos3, atp8_pos3, nad6_pos3</i>            | TIM+I+G |
|              | P10       | <i>trnE, trnP, trnT, nad2_pos1, nad3_pos1, nad6_pos1, trnS1, atp8_pos1, atp8_pos2</i>                    | GTR+I+G |
|              | P11       | <i>trnQ, trnH, cox2_pos1, cox1_pos1</i>                                                                  | TRN+I+G |
|              | P12       | <i>trnV, nad5_pos1, trnF, trnL1, trnC, nad4L_pos1, trnI, nad1_pos1, nad4_pos1</i>                        | GTR+I+G |
|              | P13       | <i>nad1_pos2, nad5_pos2, nad4_pos2</i>                                                                   | GTR+I+G |
|              | P14       | <i>nad4_pos3, nad1_pos3, nad5_pos3, nad4L_pos3</i>                                                       | TIM+G   |

| Dataset | Partition | Subset Partitions                                                  | Model   |
|---------|-----------|--------------------------------------------------------------------|---------|
|         | P15       | <i>nad4L_pos2, nad6_pos2, nad3_pos2, nad2_pos2</i>                 | HKY+I+G |
|         | P16       | <i>nad2_pos3</i>                                                   | TIM+G   |
|         | P17       | <i>rrnL, rrnS, trnD, trnG, trnN, trnS2, trnW, trnY, trnR, trnA</i> | GTR+I+G |
